# Supplementary material for: CDR3α drives selection of the immunodominant Epstein Barr virus (EBV) BRLF1-specific CD8 T cell receptor repertoire in primary infection
Source: PubMed Central journal article supplement (PMC6901265; doi:10.1371/journal.ppat.1008122), 2019-11-25
Supplement: ppat.1008122.s002.pdf [file ppat.1008122.s002.pdf]

**A**

CDR3a aa → C A V **K** **D** T D K L I F  
CDR3a nt → tgt gcc gtg aag gac acc gac aag ctc atc ttt  
AV8.1 AJ34

**B**

CDR3a aa → C A V **K** **D** T D K L I F  
CDR3a nt → tgt gcc gtg aaa gac acc gac aag ctc atc ttt  
AV8.1 AJ34
