# Supplementary material for: CDR3α drives selection of the immunodominant Epstein Barr virus (EBV) BRLF1-specific CD8 T cell receptor repertoire in primary infection
Source: PubMed Central journal article supplement (PMC6901265; doi:10.1371/journal.ppat.1008122), 2019-11-25

**A**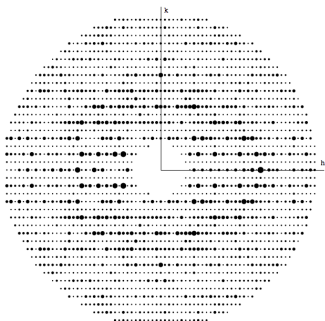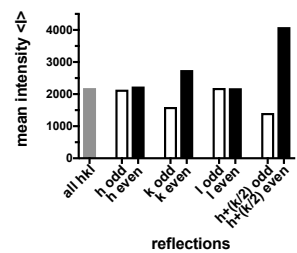**B**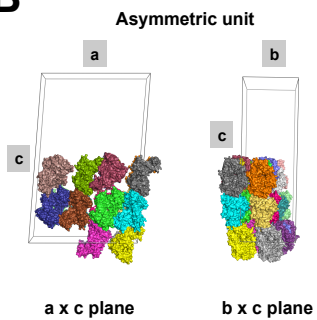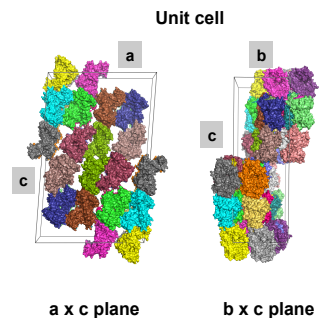**C**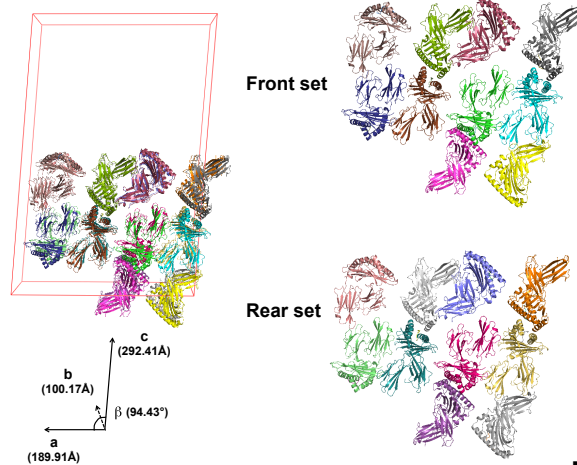**E**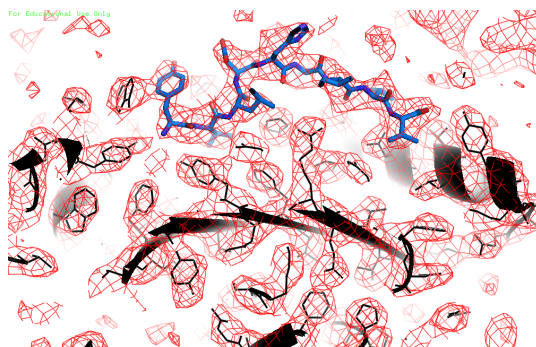**D**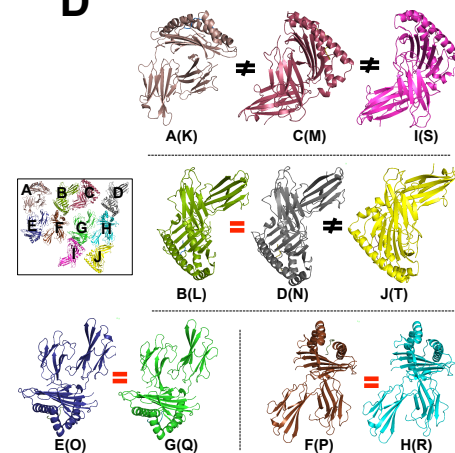**F**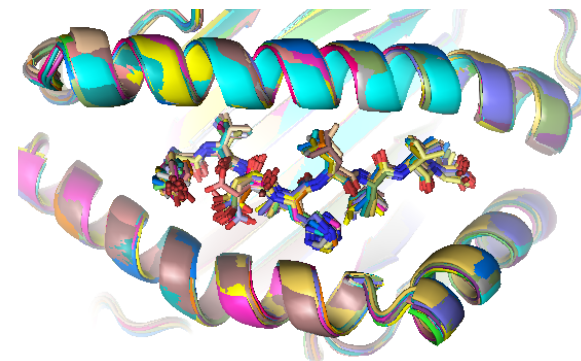

Supplement: ppat.1008122.s004.pdf [file ppat.1008122.s004.pdf]
